# Supplementary material
Source: PubMed Central journal article supplement (PMC6098226)
Supplement: en.2018-00451.sf1.pdf [file en.2018-00451.sf1.pdf]

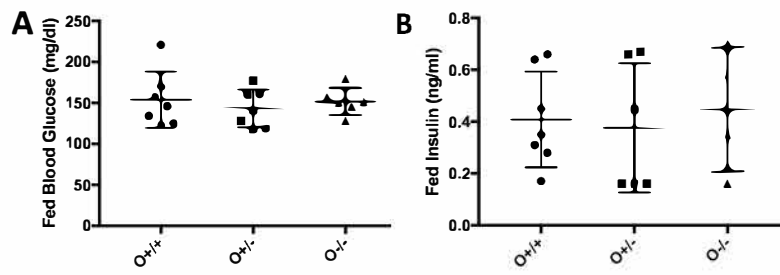

Supplementary Figure 1 Liu et al.

### Supplementary Figure Legends:

Supplementary Figure 1. Blood glucose (A) and plasma insulin (B) levels in WT (O<sup>+/+</sup>), *Olfm4*-heterozygous (O<sup>+/-</sup>) and *Olfm4*-deficient (O<sup>-/-</sup>) mice under standard chow conditions. Data are expressed as mean  $\pm$  SEM.
